# Supplementary material for: Single-Cell Profiling Reveals Immune-Based Mechanisms Underlying Tumor Radiosensitization by a Novel Mn Porphyrin Clinical Candidate, MnTnBuOE-2-PyP5+ (BMX-001)
Source: Antioxidants (Basel). 2024 Apr 17;13(4):477. doi: 10.3390/antiox13040477 (PMC11047573; doi:10.3390/antiox13040477)
Supplement: Supplementary file 1 [file antioxidants-13-00477-s001.zip]

Archive with 9 entries (9 files):
- Figure S1.pdf
- Figure S2.pdf
- Figure S3.pdf
- Figure S4.pdf
- Figure S5.pdf
- Figure S6.pdf
- Figure S7.pdf
- Figure S8.pdf
- Supplementary Materials (revised, antioxidants-28822362).pdf
