# Supplementary figures and images for: Single-Cell Profiling Reveals Immune-Based Mechanisms Underlying Tumor Radiosensitization by a Novel Mn Porphyrin Clinical Candidate, MnTnBuOE-2-PyP5+ (BMX-001)
Source: MDPI journal article supplement (doi:10.3390/antiox13040477), 2024-04-17

**A**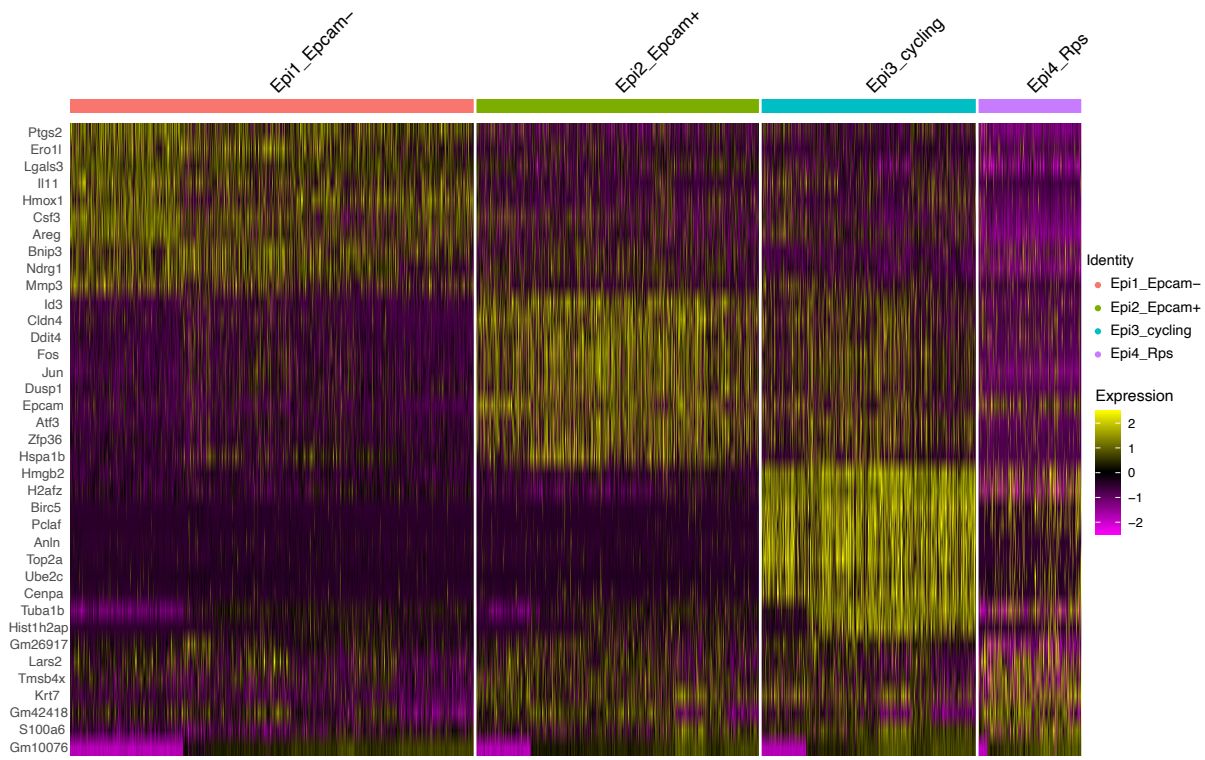**B**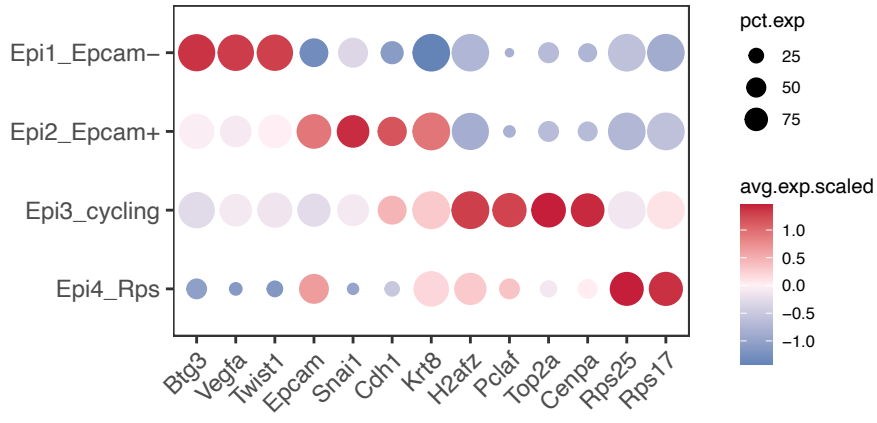**C**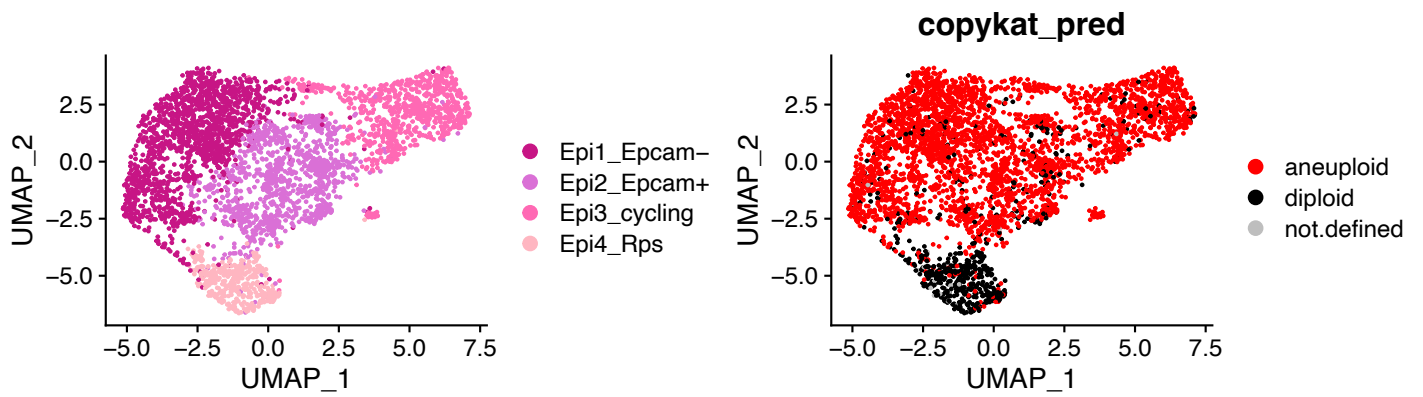

Supplement: s1 [file s1]

**A**

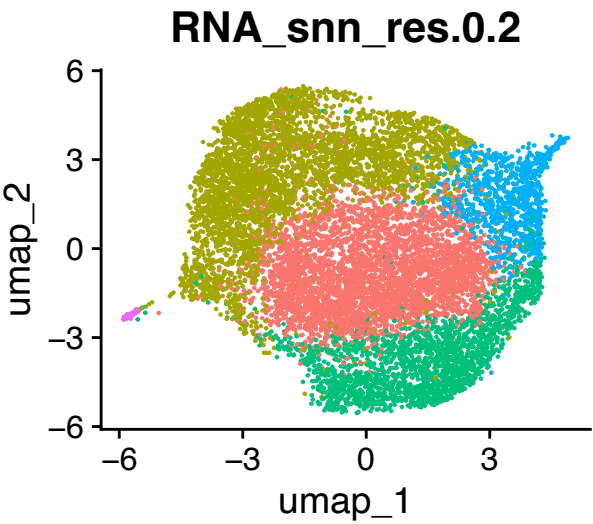

**B**

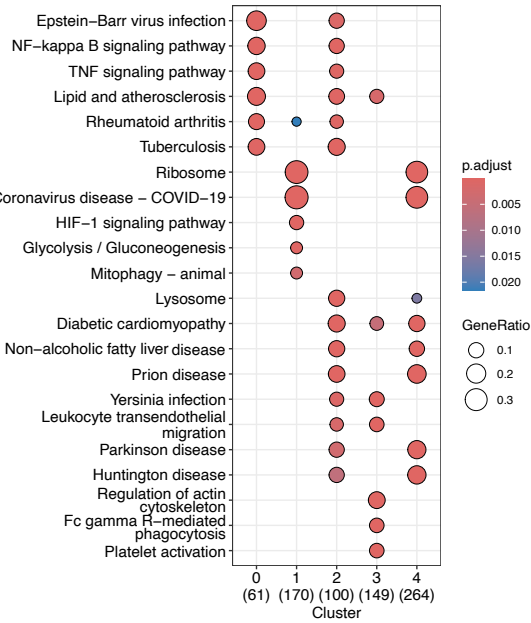

**C**

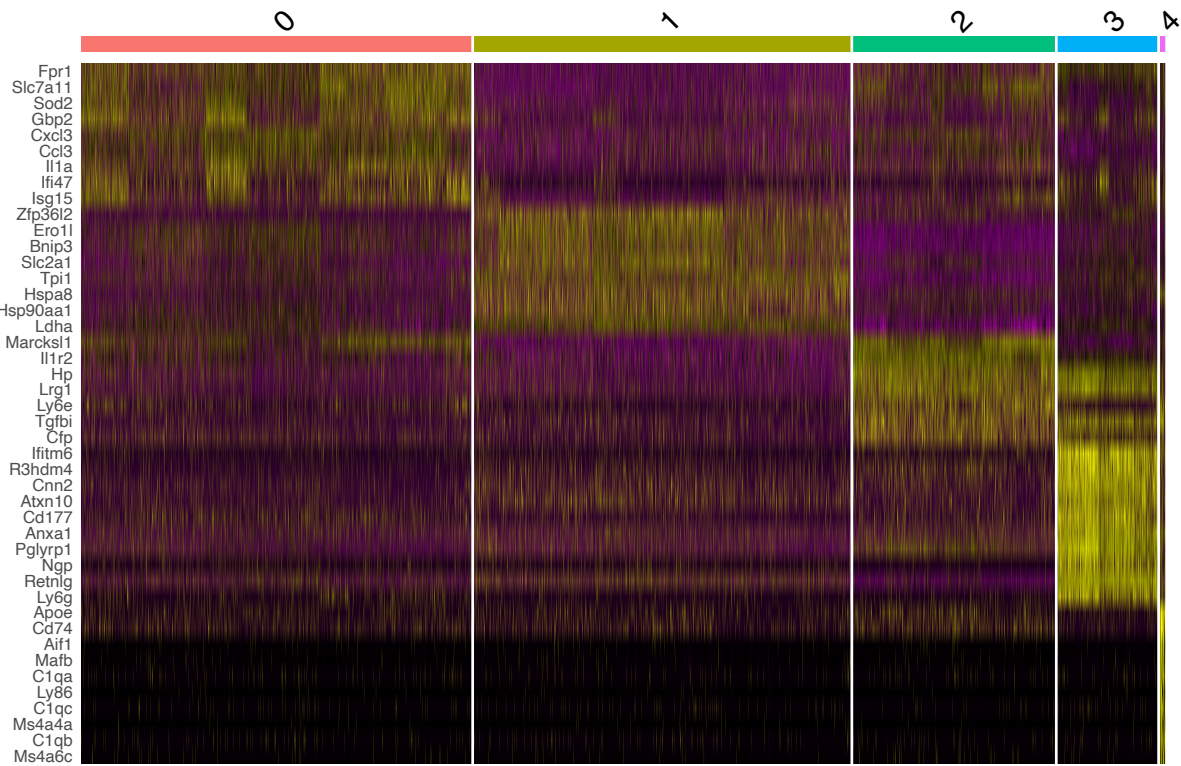

Supplement: s1 [file s1]

**A**

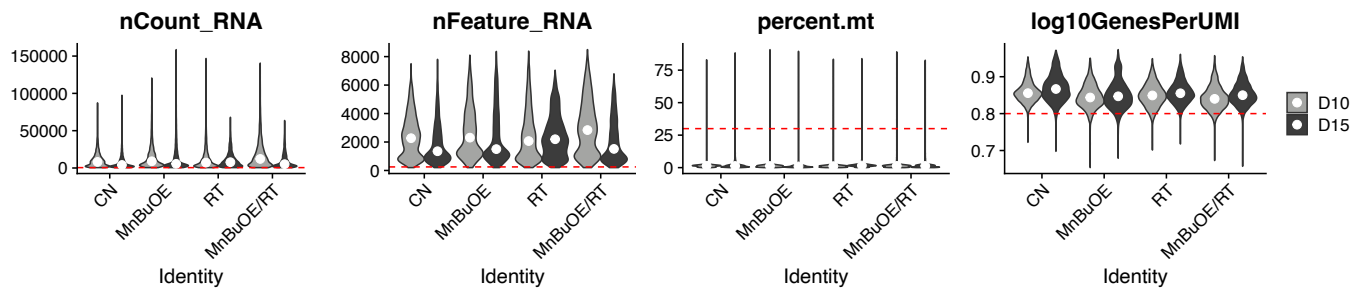**B**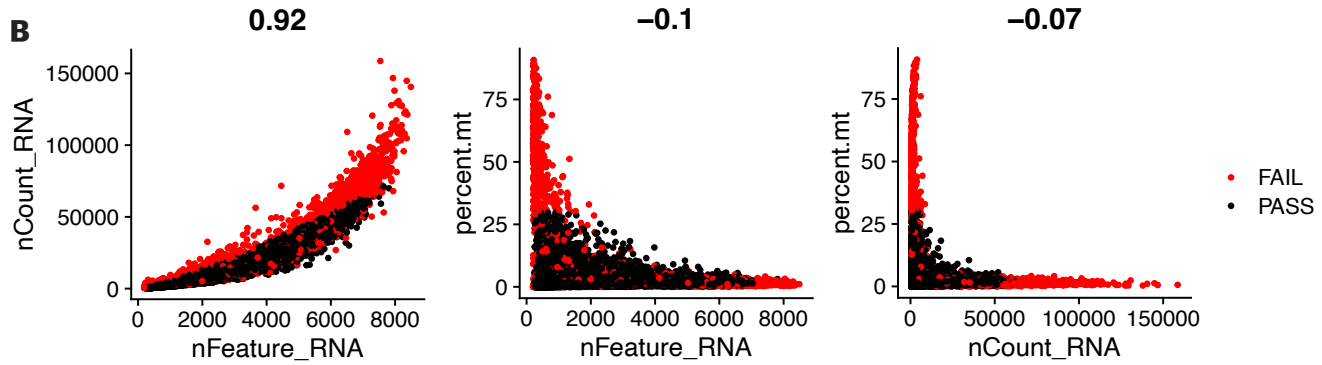

**C**

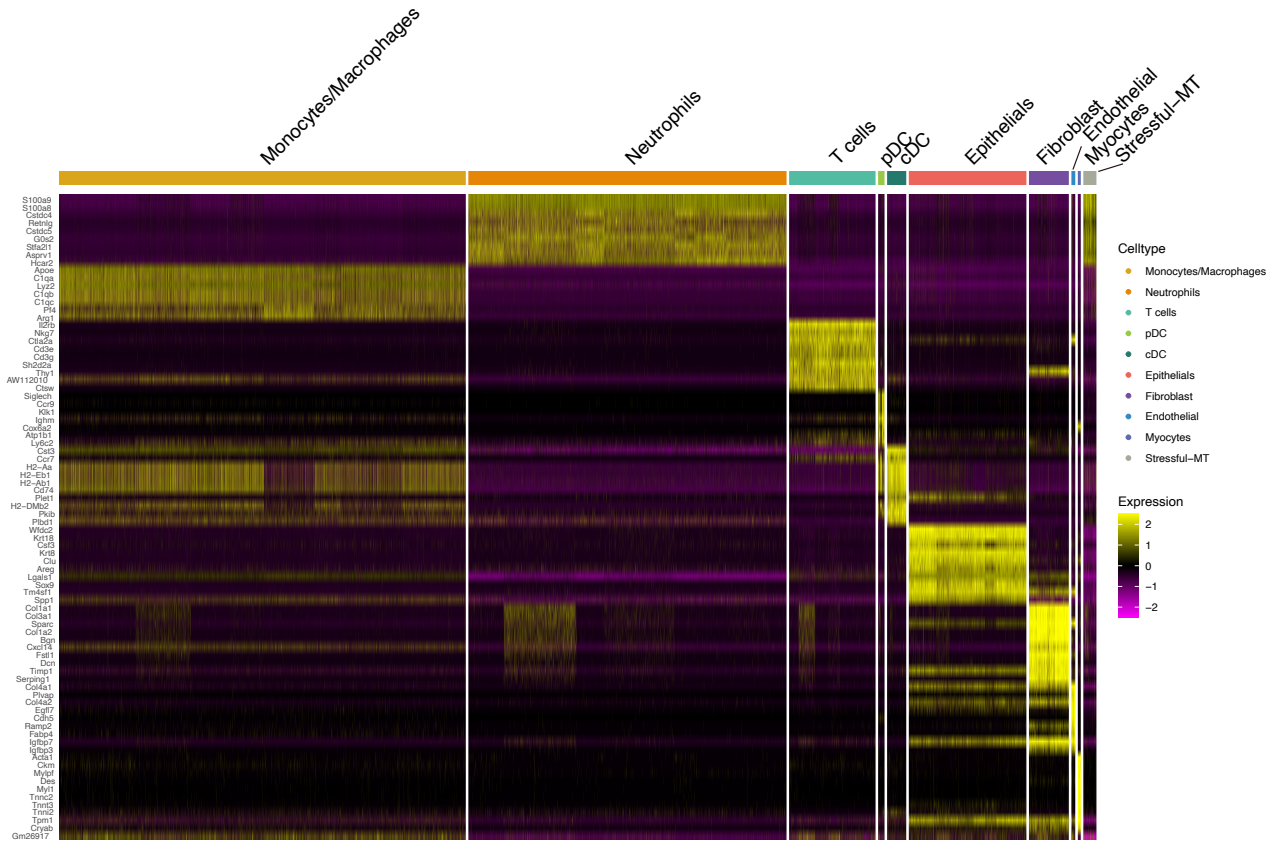

## D

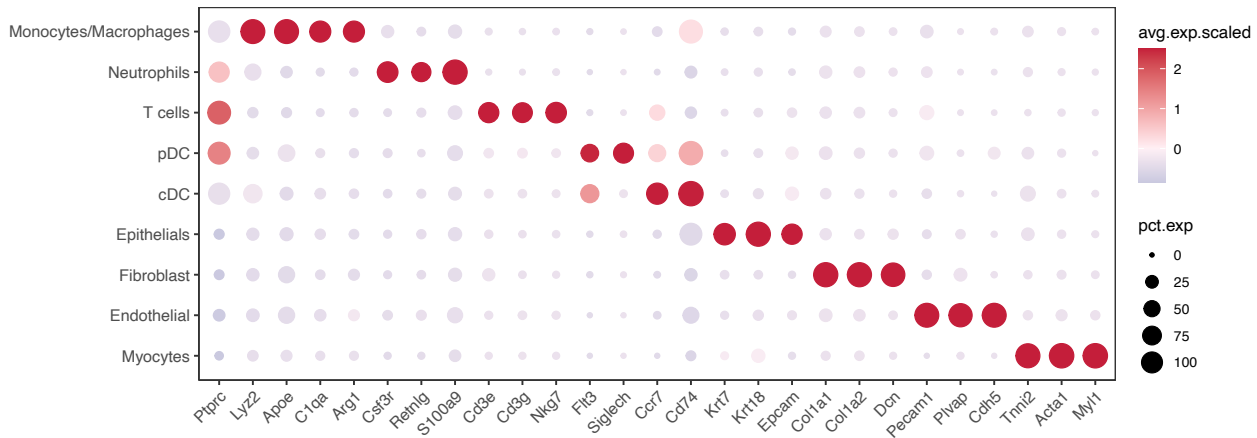

Supplement: s1 [file s1]

**A**

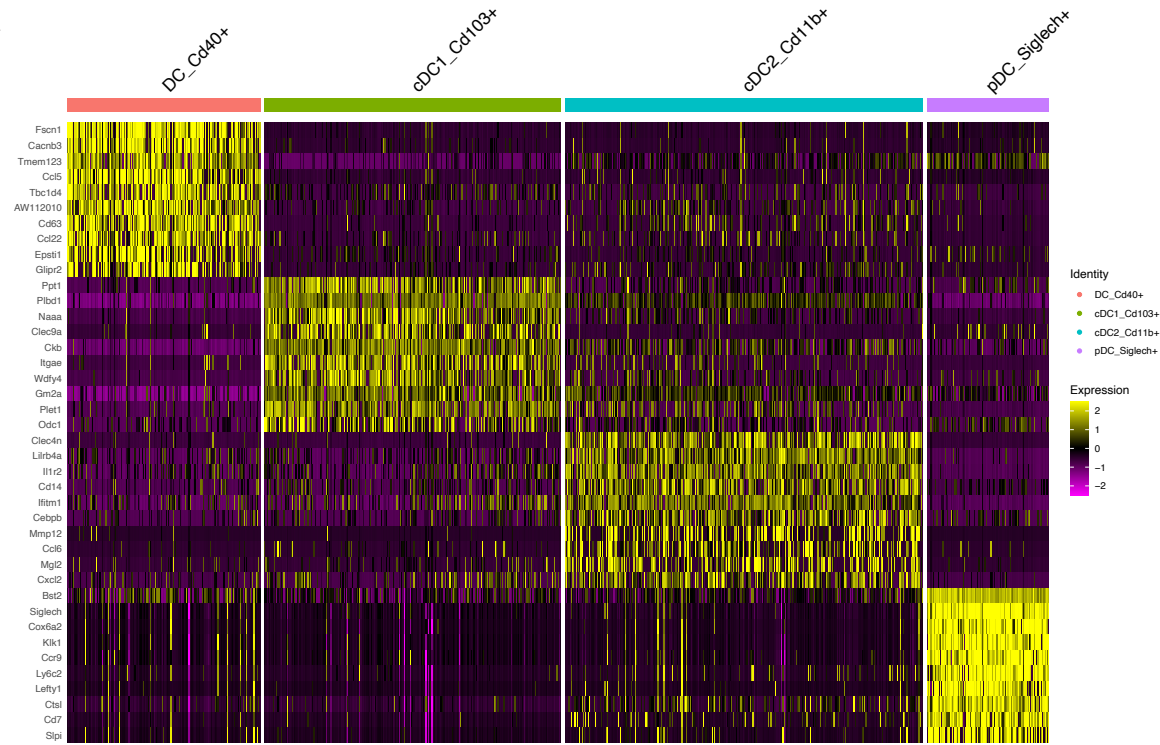

**B**

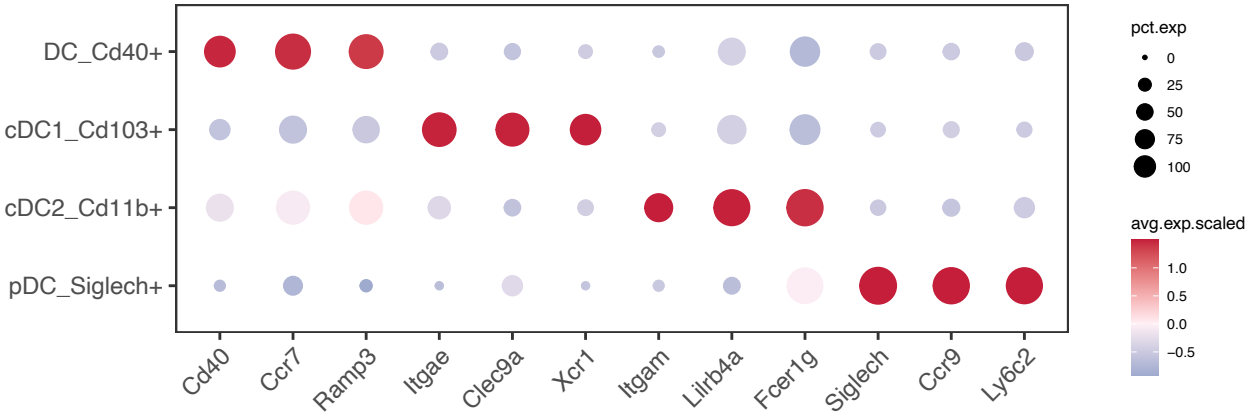

Supplement: s1 [file s1]

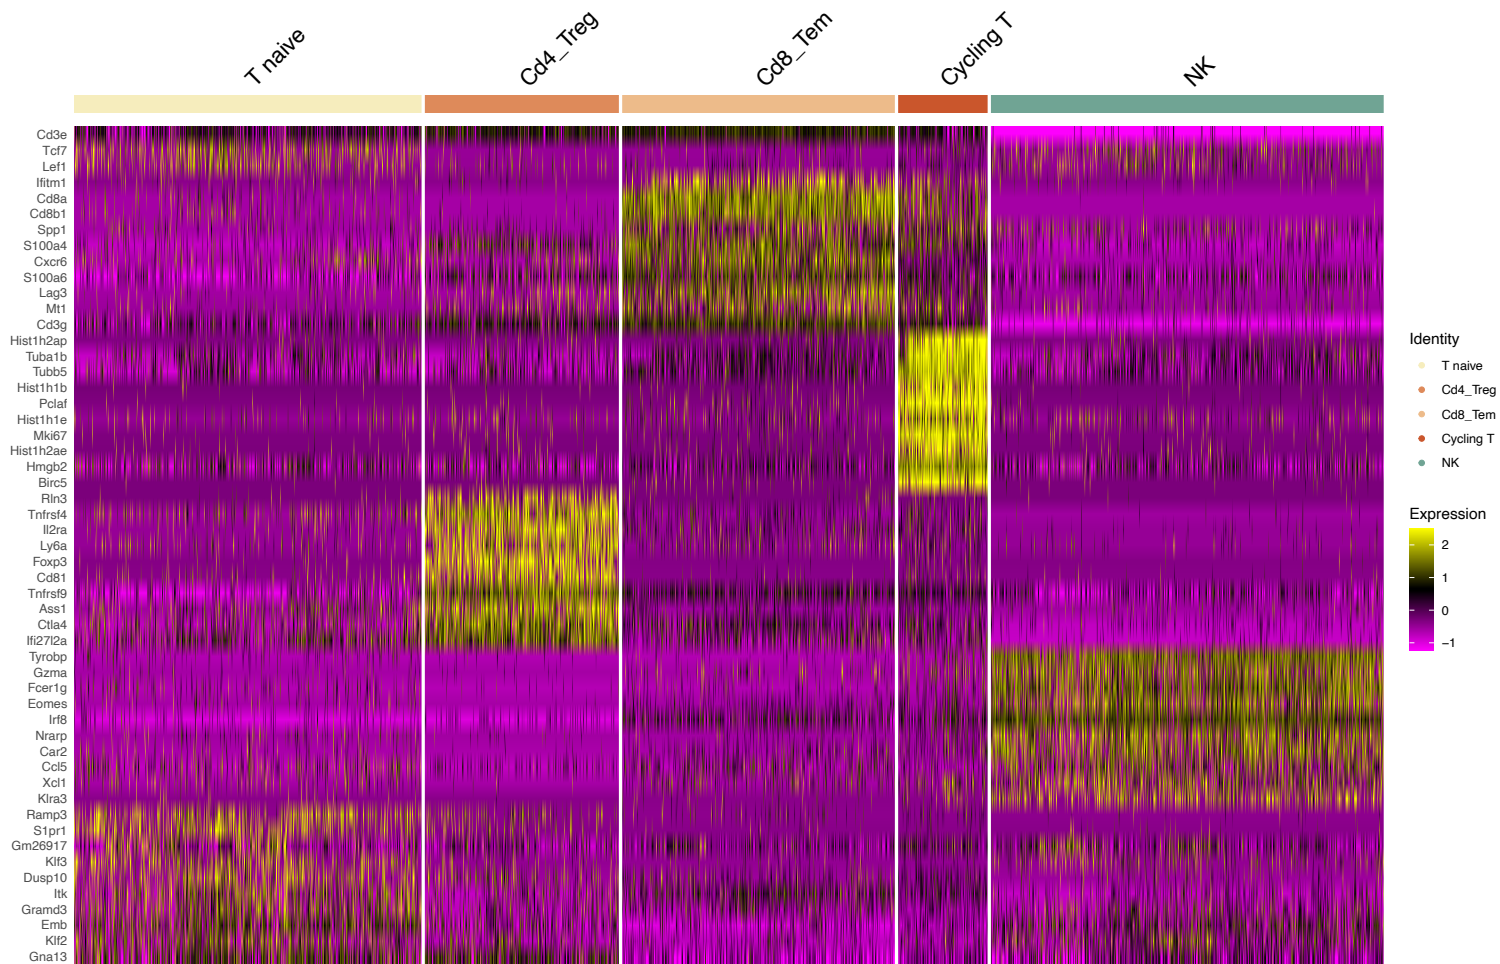

Supplement: s1 [file s1]

A

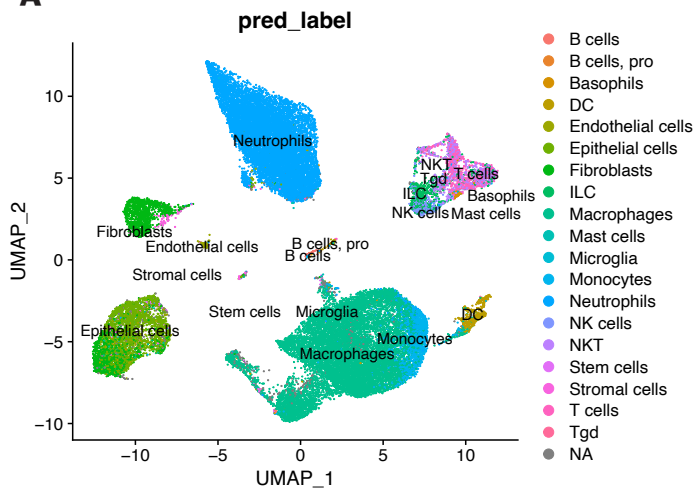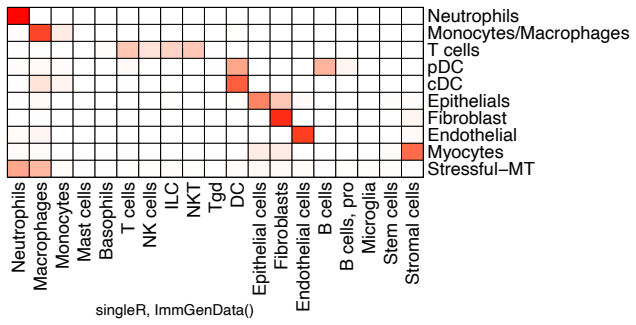

B

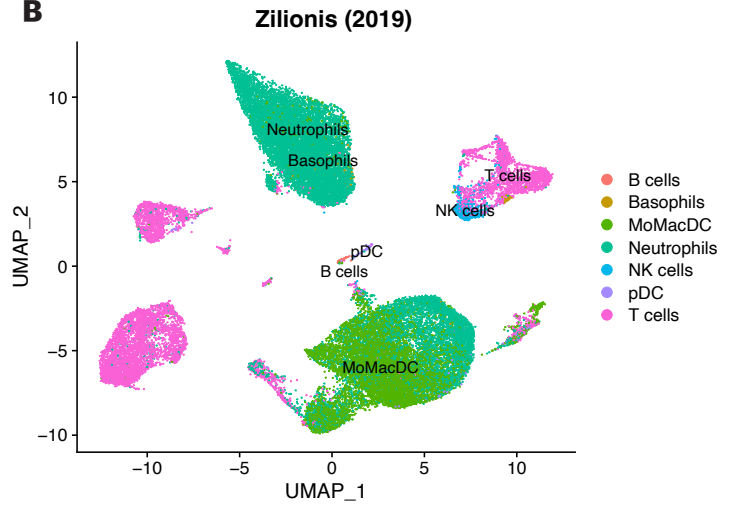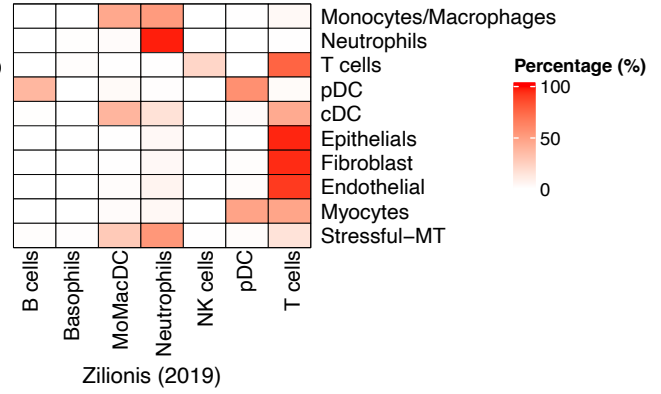

C

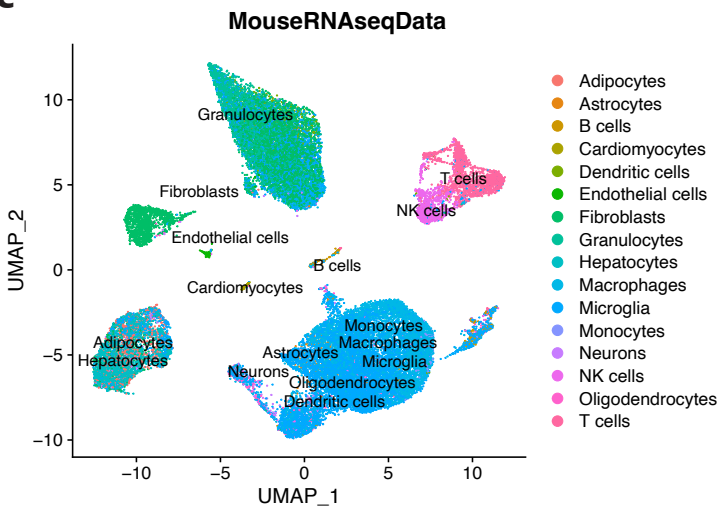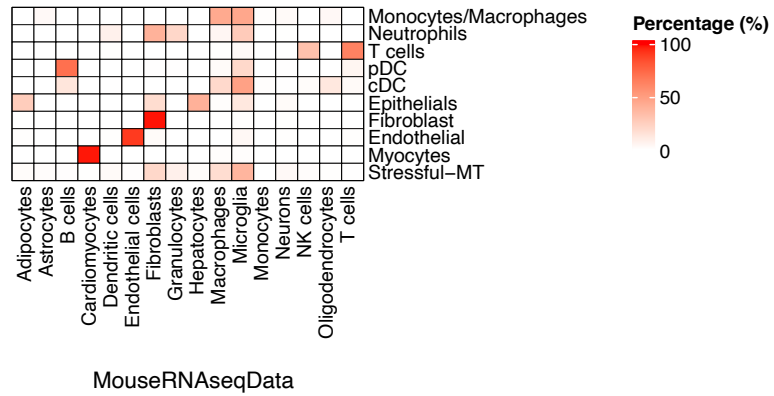

Supplement: s1 [file s1]

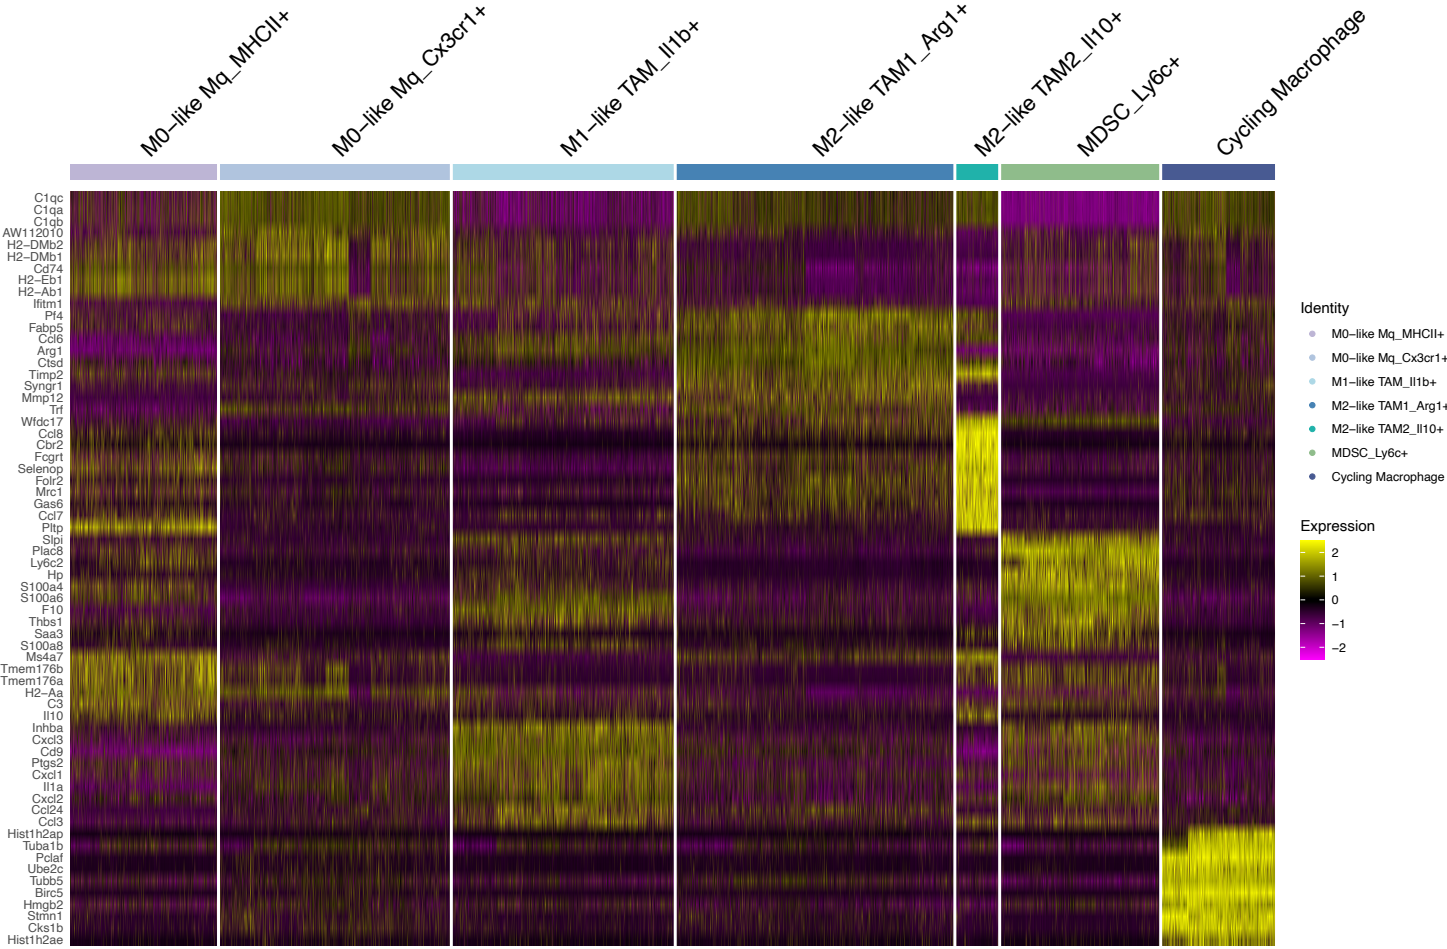

Supplement: s1 [file s1]

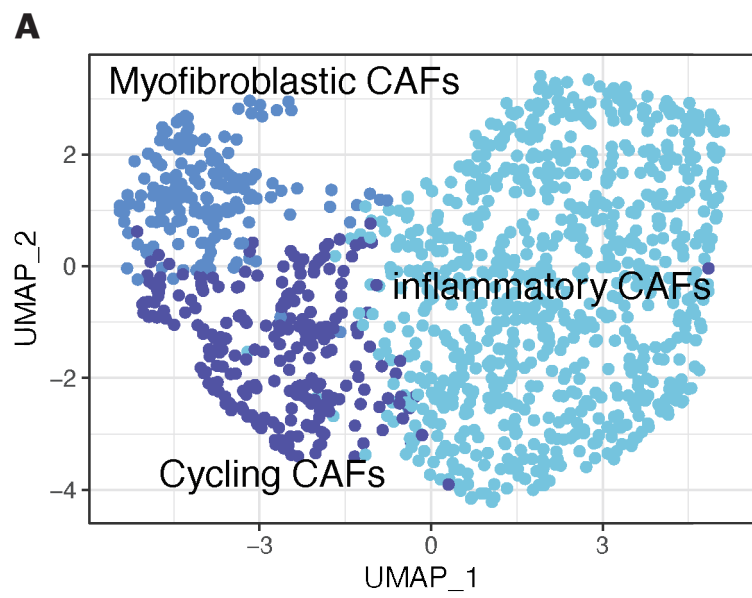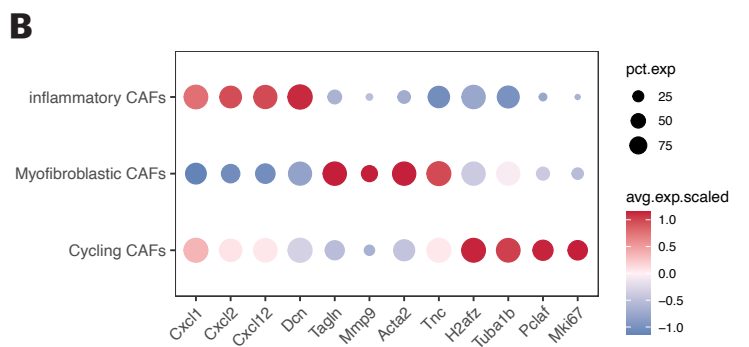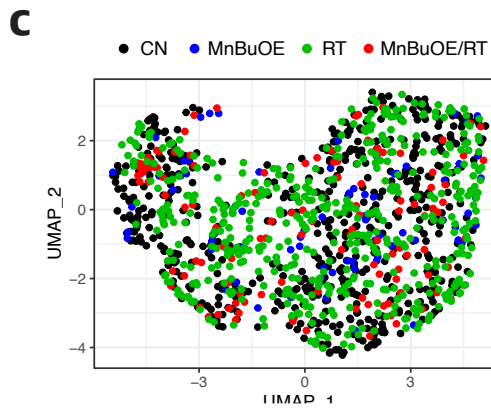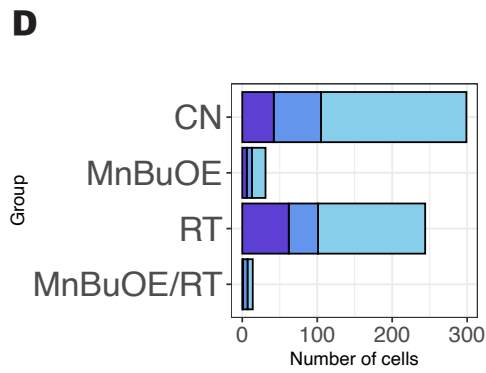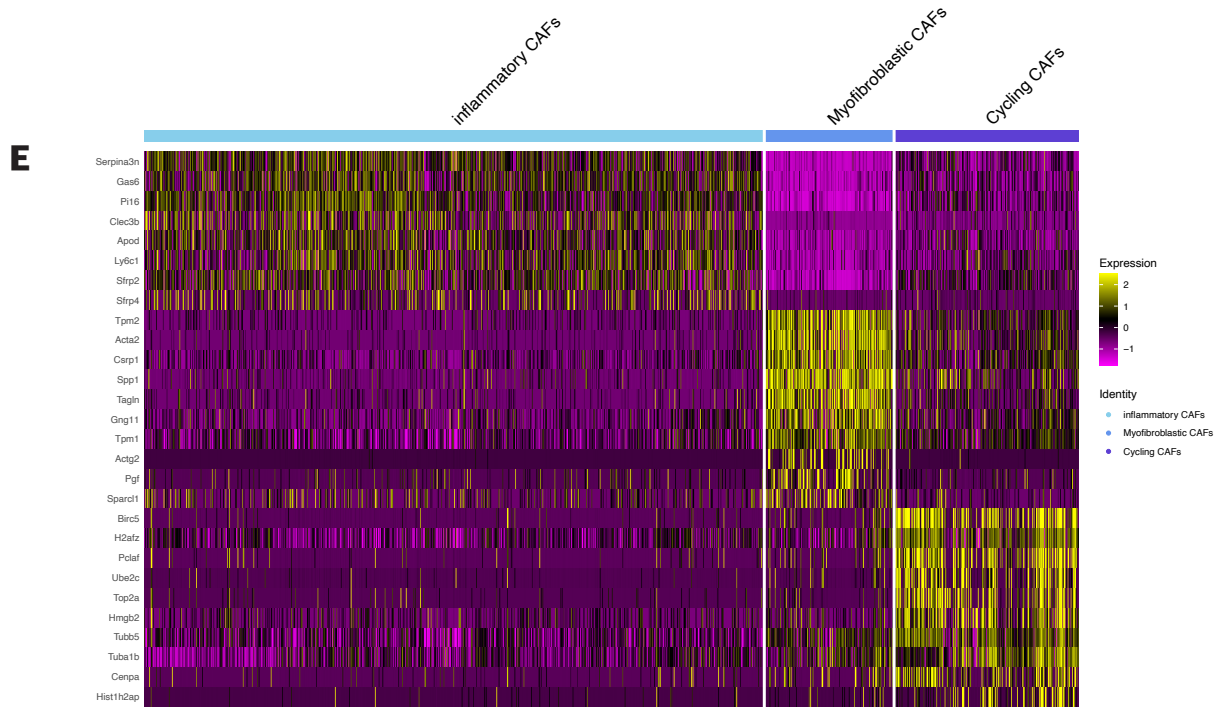

Supplement: s1 [file s1]
